# Supplementary material for: Expression patterns of cardiac aging in Drosophila
Source: PubMed Central journal article supplement (PMC5242310; doi:10.1111/acel.12559), 2017-01-16
Supplement: ACEL-16-82-s005.pdf [file ACEL-16-82-s005.pdf]

Supplemental Table 2. GO terms enriched in up- and down-regulated genes

| UP-REGULATED | Ontology ID    | Ontology Name                                    | Ontology Type  | No. Changed | No. Measured | No. in Ontolog    | % Changed       | % Present      | Z Score    | Permute P | Adjusted P |
|--------------|----------------|--------------------------------------------------|----------------|-------------|--------------|-------------------|-----------------|----------------|------------|-----------|------------|
|              | GO:0030554     | adenyl nucleotide binding                        | molecular_fun  | 25          | 850          | 867               | 2.94            | 98.04          | 2.05083803 | 0.0595    | 1          |
|              | GO:0032559     | adenyl ribonucleotide binding                    | molecular_fun  | 25          | 849          | 866               | 2.94            | 98.04          | 2.05704183 | 0.0595    | 1          |
|              | GO:0040812     | aminoadipate lyase activity                      | molecular_fun  | 4           | 68           | 68                | 5.55            | 98.55          | 2.20859005 | 0.01875   | 1          |
|              | GO:0005524     | ATP binding                                      | molecular_fun  | 25          | 847          | 864               | 2.95            | 98.03          | 2.06947206 | 0.062     | 1          |
|              | GO:0043190     | ATP-binding cassette (ABC) transporter           | cellular_comp  | 3           | 43           | 43                | 6.98            | 100.00         | 2.33981471 | 0.0355    | 1          |
|              | GO:0022403     | cell cycle phase                                 | biological_pro | 13          | 222          | 222               | 5.86            | 100.00         | 4.15391262 | 0         | 0.32425    |
|              | GO:0022402     | cell cycle process                               | biological_pro | 19          | 222          | 222               | 5.86            | 99.62          | 2.75117252 | 0.0025    | 0.60796874 |
|              | GO:0000267     | cell fraction                                    | cellular_comp  | 7           | 118          | 118               | 5.93            | 100.00         | 3.07366599 | 0.0015    | 0.486375   |
|              | GO:0044464     | cell part                                        | cellular_comp  | 136         | 6053         | 6530              | 2.25            | 92.70          | 2.07343074 | 0.82125   | 1          |
|              | GO:0071842     | cellular component organization at cell junction | cellular_comp  | 37          | 1349         | 1468              | 2.74            | 91.89          | 2.09309422 | 0.075     | 1          |
|              | GO:0044255     | cellular lipid metabolic process                 | biological_pro | 10          | 197          | 198               | 5.08            | 99.49          | 3.11902121 | 0.00125   | 0.46321429 |
|              | GO:0044427     | chromosomal part                                 | cellular_comp  | 11          | 267          | 377               | 4.12            | 70.82          | 2.51192043 | 0.0025    | 0.60796875 |
|              | GO:0051276     | chromosome organization                          | biological_pro | 11          | 297          | 406               | 3.70            | 73.15          | 2.13318484 | 0.014     | 1          |
|              | GO:0000781     | chromosome, telomeric region                     | cellular_comp  | 3           | 11           | 11                | 27.27           | 100.00         | 5.99694947 | 0.00075   | 0.38975    |
|              | GO:0008234     | cysteine-type peptidase activity                 | molecular_fun  | 4           | 77           | 78                | 5.19            | 98.72          | 2.01402121 | 0.03425   | 1          |
|              | GO:0015036     | disulfide oxidoreductase activity                | molecular_fun  | 3           | 29           | 29                | 10.34           | 100.00         | 3.21881951 | 0.007     | 1          |
|              | GO:0006259     | DNA metabolic process                            | biological_pro | 10          | 250          | 251               | 4.00            | 99.50          | 2.29168345 | 0.0095    | 1          |
|              | GO:0008094     | DNA-dependent ATPase activity                    | molecular_fun  | 3           | 37           | 37                | 8.11            | 100.00         | 2.66271272 | 0.02025   | 1          |
|              | GO:0004519     | endonuclease activity                            | molecular_fun  | 3           | 49           | 50                | 6.12            | 98.00          | 2.06989569 | 0.041     | 1          |
|              | GO:0005789     | endoplasmic reticulum membrane                   | cellular_comp  | 7           | 145          | 145               | 4.83            | 100.00         | 2.45411219 | 0.00575   | 1          |
|              | GO:0031012     | extracellular matrix                             | cellular_comp  | 4           | 51           | 84                | 5.84            | 100.00         | 2.99251915 | 0.01375   | 1          |
|              | GO:0044421     | extracellular region part                        | cellular_comp  | 9           | 166          | 178               | 5.42            | 93.26          | 3.1797714  | 0.00125   | 0.46321429 |
|              | GO:0030718     | germ-line stem cell maintenance                  | biological_pro | 3           | 36           | 36                | 8.33            | 100.00         | 2.72314119 | 0.018     | 1          |
|              | GO:0046486     | glycerolipid metabolic process                   | biological_pro | 4           | 36           | 36                | 6.98            | 98.36          | 2.59384088 | 0.02025   | 1          |
|              | GO:0006650     | glycerophospholipid metabolic process            | biological_pro | 4           | 53           | 54                | 7.55            | 98.15          | 2.89648329 | 0.011     | 1          |
|              | GO:0006055     | GPI anchor metabolic process                     | biological_pro | 3           | 25           | 25                | 12.00           | 100.00         | 3.58043554 | 0.0065    | 1          |
|              | GO:0004553     | hydrolase activity, hydrolyzing O-glycosyl       | molecular_fun  | 5           | 103          | 108               | 4.85            | 95.37          | 2.08203576 | 0.019     | 1          |
|              | GO:0015103     | inorganic anion transmembrane transport          | molecular_fun  | 3           | 44           | 44                | 6.82            | 100.00         | 2.92162236 | 0.03475   | 1          |
|              | GO:0005626     | insoluble fraction                               | cellular_comp  | 6           | 113          | 113               | 5.31            | 100.00         | 2.53162386 | 0.00575   | 1          |
|              | GO:0008299     | isoprenoid biosynthetic process                  | biological_pro | 3           | 15           | 15                | 20.00           | 100.00         | 4.98892955 | 0.001     | 0.40957895 |
|              | GO:0006720     | isoprenoid metabolic process                     | biological_pro | 3           | 15           | 15                | 20.00           | 100.00         | 5.90740055 | 0.002     | 0.60796875 |
|              | GO:0000776     | kinetochore                                      | cellular_comp  | 5           | 29           | 29                | 17.24           | 100.00         | 5.87767728 | 0         | 0.32425    |
|              | GO:0016876     | ligase activity, forming aminoacyl-tRNA          | molecular_fun  | 4           | 68           | 69                | 5.88            | 98.55          | 2.29850005 | 0.01875   | 1          |
|              | GO:0016875     | ligase activity, forming carbon-oxygen           | molecular_fun  | 4           | 68           | 68                | 5.88            | 98.55          | 2.29850005 | 0.01875   | 1          |
|              | GO:0009057     | macromolecule catabolic process                  | biological_pro | 8           | 199          | 202               | 4.02            | 98.51          | 2.060271   | 0.01225   | 1          |
|              | GO:0005624     | membrane fraction                                | cellular_comp  | 6           | 109          | 109               | 5.50            | 100.00         | 2.63213043 | 0.00475   | 0.97275    |
|              | GO:0004222     | metalloendopeptidase activity                    | molecular_fun  | 5           | 82           | 82                | 6.10            | 100.00         | 2.66551503 | 0.011     | 1          |
|              | GO:0007552     | metastasis                                       | cellular_comp  | 3           | 27           | 27                | 11.11           | 96.43          | 3.39059555 | 0.0105    | 1          |
|              | GO:0005792     | microsome                                        | cellular_comp  | 5           | 88           | 88                | 5.68            | 100.00         | 2.48210813 | 0.00875   | 1          |
|              | GO:0031023     | microtubule organizing center organization       | biological_pro | 3           | 48           | 48                | 6.25            | 100.00         | 2.11189276 | 0.0425    | 1          |
|              | GO:0007067     | mitosis                                          | biological_pro | 3           | 138          | 138               | 8.00            | 100.00         | 3.2128063  | 0.002     | 0.53669966 |
|              | GO:0007094     | mitotic cell cycle spindle assembly              | biological_pro | 3           | 12           | 12                | 25.00           | 100.00         | 5.70086451 | 0.00025   | 0.32425    |
|              | GO:0071174     | mitotic cell cycle spindle checkpoint            | biological_pro | 3           | 12           | 12                | 25.00           | 100.00         | 5.70086451 | 0.00025   | 0.32425    |
|              | GO:0004497     | monooxygenase activity                           | molecular_fun  | 6           | 116          | 117               | 5.17            | 99.15          | 2.45905722 | 0.01      | 1          |
|              | GO:0004572     | negative regulation of cell cycle                | biological_pro | 3           | 39           | 39                | 7.69            | 100.00         | 2.54799254 | 0.02425   | 1          |
|              | GO:0010948     | negative regulation of cell cycle                | biological_pro | 3           | 29           | 29                | 18.34           | 100.00         | 3.21881951 | 0.0085    | 1          |
|              | GO:0045839     | negative regulation of mitosis                   | biological_pro | 3           | 16           | 16                | 10.75           | 100.00         | 4.79502808 | 0.001     | 0.40957895 |
|              | GO:0045841     | negative regulation of mitotic metaphase         | biological_pro | 3           | 14           | 14                | 14.43           | 100.00         | 5.20196131 | 0.0075    | 0.38975    |
|              | GO:0051784     | negative regulation of nuclear division          | biological_pro | 3           | 16           | 16                | 18.75           | 100.00         | 4.79502808 | 0.001     | 0.40957895 |
|              | GO:0010639     | negative regulation of organelle organization    | biological_pro | 3           | 40           | 40                | 7.50            | 100.00         | 2.49345246 | 0.02075   | 1          |
|              | GO:0000280     | nuclear division                                 | biological_pro | 8           | 141          | 141               | 5.67            | 100.00         | 3.14259575 | 0.002     | 0.53669966 |
|              | GO:0048285     | organelle fission                                | biological_pro | 8           | 146          | 146               | 5.68            | 100.00         | 3.02957936 | 0.0075    | 0.62942647 |
|              | GO:0006996     | organelle organization                           | biological_pro | 31          | 974          | 1091              | 3.18            | 89.28          | 2.77321697 | 0.00575   | 1          |
|              | GO:0016667     | oxidoreductase activity, acting on a             | molecular_fun  | 3           | 41           | 41                | 7.32            | 100.00         | 2.44664116 | 0.01825   | 1          |
|              | GO:0046488     | phosphatidylinositol metabolic process           | biological_pro | 4           | 44           | 44                | 6.09            | 95.78          | 2.31645511 | 0.0075    | 1          |
|              | GO:0046148     | pigment biosynthetic process                     | biological_pro | 4           | 51           | 51                | 7.84            | 100.00         | 2.99251915 | 0.0065    | 1          |
|              | GO:0042440     | pigment metabolic process                        | biological_pro | 4           | 69           | 69                | 5.80            | 100.00         | 2.26466333 | 0.024     | 1          |
|              | GO:0006779     | porphyrin biosynthetic process                   | biological_pro | 3           | 11           | 11                | 27.27           | 100.00         | 5.99694947 | 0.0015    | 0.486375   |
|              | GO:0005778     | porphyria                                        | biological_pro | 3           | 12           | 12                | 25.00           | 100.00         | 5.70086451 | 0.0015    | 0.486375   |
|              | GO:0007088     | regulation of mitosis                            | biological_pro | 4           | 46           | 46                | 6.72            | 100.00         | 3.25566561 | 0.00725   | 1          |
|              | GO:0030071     | regulation of mitotic metaphase/anaphase         | biological_pro | 4           | 24           | 24                | 16.70           | 100.00         | 5.14429492 | 0.001     | 0.40957895 |
|              | GO:0051783     | regulation of nuclear division                   | biological_pro | 3           | 12           | 12                | 25.00           | 100.00         | 3.25566561 | 0.00725   | 1          |
|              | GO:0005819     | spindle                                          | cellular_comp  | 4           | 43           | 43                | 9.30            | 100.00         | 3.43227416 | 0.00375   | 0.83378571 |
|              | GO:0071173     | spindle assembly checkpoint                      | biological_pro | 3           | 12           | 12                | 25.00           | 100.00         | 5.70086451 | 0.00025   | 0.32425    |
|              | GO:0031577     | spindle checkpoint                               | biological_pro | 3           | 12           | 12                | 25.00           | 100.00         | 5.70086451 | 0.00025   | 0.32425    |
|              | GO:0019827     | stem cell maintenance                            | cellular_comp  | 3           | 47           | 47                | 3.98            | 100.00         | 1.55003981 | 0.0425    | 1          |
|              | GO:0044456     | synapse part                                     | cellular_comp  | 6           | 125          | 126               | 4.80            | 99.21          | 2.25432652 | 0.04325   | 1          |
|              | GO:0033014     | tetrapyrrole biosynthetic process                | biological_pro | 3           | 13           | 13                | 23.08           | 100.00         | 5.43768722 | 0.00175   | 0.50438889 |
|              | GO:0033013     | tetrapyrrole biosynthetic process                | biological_pro | 3           | 14           | 14                | 24.29           | 100.00         | 5.20196131 | 0.00175   | 0.50438889 |
|              | GO:0000151     | ubiquitin ligase complex                         | cellular_comp  | 3           | 14           | 14                | 48.25           | 100.00         | 2.11189276 | 0.037     | 1          |
|              | GO:0042598     | vesicular fraction                               | cellular_comp  | 5           | 88           | 88                | 5.68            | 100.00         | 2.48210813 | 0.00875   | 1          |
|              | DOWN-REGULATED |                                                  |                |             |              |                   |                 |                |            |           |            |
|              | Ontology ID    | Ontology Name                                    | Ontology Type  | Number      | Meas.        | Number in Ontolog | Percent Changed | Percent Preser | Z Score    | PermuteP  | AdjustedP  |
|              | GO:0022804     | active transmembrane transporter                 | molecular_fun  | 12          | 372          | 377               | 3.23            | 98.67          | 2.85693886 | 0.003     | 1          |
|              | GO:0046154     | alcohol dehydrogenase activity                   | molecular_fun  | 3           | 51           | 51                | 5.88            | 100.00         | 2.62121722 | 0.0325    | 1          |
|              | GO:0005275     | amine transmembrane transporter                  | molecular_fun  | 4           | 59           | 59                | 6.78            | 100.00         | 3.39410121 | 0.007     | 1          |
|              | GO:0015837     | amine transport                                  | biological_pro | 3           | 44           | 44                | 6.82            | 100.00         | 2.95032707 | 0.02025   | 1          |
|              | GO:0015171     | amino acid transmembrane transporter             | molecular_fun  | 4           | 54           | 54                | 7.41            | 100.00         | 3.63031984 | 0.0045    | 1          |
|              | GO:0006865     | amino acid transport                             | biological_pro | 4           | 40           | 40                | 5.90            | 100.00         | 1.71211036 | 0.01375   | 1          |
|              | GO:0006022     | aminoglycan metabolic process                    | biological_pro | 5           | 140          | 150               | 3.57            | 93.33          | 2.07566587 | 0.0175    | 1          |
|              | GO:0006820     | anion transport                                  | biological_pro | 3           | 53           | 54                | 5.66            | 98.15          | 2.53781528 | 0.024     | 1          |
|              | GO:0043492     | ATPase activity, coupled to movement of          | molecular_fun  | 6           | 147          | 151               | 4.08            | 97.35          | 2.64466965 | 0.00875   | 1          |
|              | GO:0042426     | ATPase activity, coupled to transmembrane        | molecular_fun  | 6           | 147          | 151               | 4.08            | 97.35          | 2.64466965 | 0.00875   | 1          |
|              | GO:0043190     | ATP-binding cassette (ABC) transporter           | cellular_comp  | 3           | 43           | 43                | 6.98            | 100.00         | 3.00297625 | 0.01475   | 1          |
|              | GO:0005509     | calcium ion binding                              | molecular_fun  | 8           | 231          | 236               | 3.46            | 97.88          | 2.53838397 | 0.01075   | 1          |
|              | GO:0016052     | carbohydrate catabolic process                   | biological_pro | 13          | 406          | 413               | 6.82            | 98.84          | 3.38915012 | 0.0025    | 0.38975    |
|              | GO:0005975     | carbohydrate metabolic process                   | biological_pro | 13          | 408          | 422               | 3.19            | 96.68          | 2.92947458 | 0.002     | 1          |
|              | GO:0046943     | carboxylic acid transmembrane transporter        | molecular_fun  | 7           | 86           | 87                | 8.14            | 98.85          | 5.15399915 | 0.00025   | 0.38975    |
|              | GO:0046942     | carboxylic acid transport                        | biological_pro | 5           | 76           | 76                | 8.14            | 98.18          | 4.76289919 | 0.00025   | 0.38975    |
|              | GO:0044275     | cellular carbohydrate catabolic process          | biological_pro | 4           | 51           | 51                | 7.84            | 100.00         | 3.78652351 | 0.00275   | 1          |
|              | GO:0044262     | cellular carbohydrate metabolic process          | biological_pro | 6           | 184          | 188               | 3.26            | 97.87          | 2.03167306 | 0.032     | 1          |
|              | GO:0008061     | chitin binding                                   | molecular_fun  | 4           | 99           | 107               | 4.04            | 92.52          | 2.13138702 | 0.02625   | 1          |
|              | GO:0006030     | chitin metabolic process                         | biological_pro | 4           | 113          | 121               | 4.92            | 93.39          | 2.61066867 | 0.0085    | 1          |
|              | GO:0048512     | circadian behavior                               | biological_pro | 4           | 45           | 45                | 8.89            | 100.00         | 4.13950999 | 0.0075    | 1          |
