# Supplementary material for: Expression patterns of cardiac aging in Drosophila
Source: PubMed Central journal article supplement (PMC5242310; doi:10.1111/acel.12559), 2017-01-16
Supplement: ACEL-16-82-s007.pdf [file ACEL-16-82-s007.pdf]

Supplemental Table-4. Filtered (Z&lt;2) oPOSSUM enrichment analysis of transcription factor binding sites within 2kb of the transcriptional start site of Up and Down-regulated Aging transcripts (Aging P&lt;0.005, Interaction P&gt;0.05)

| Group                     | TF           | Class                  | Family                    | Target gene hits | Target gene non-hits | Background gene hits | Background |               | Target TFBS hits | Target TFBS nucleotide rate | Background TFBS |                 | Z-score |
|---------------------------|--------------|------------------------|---------------------------|------------------|----------------------|----------------------|------------|---------------|------------------|-----------------------------|-----------------|-----------------|---------|
|                           |              |                        |                           |                  |                      |                      | gene hits  | gene non-hits |                  |                             | hits            | nucleotide rate |         |
| Genes Upregulated Age     | odd          | Zinc-coordinating      | BetaBetaAlpha-zinc finger | 51               | 186                  | 3142                 | 9735       | 81            | 0.00452          | 4581                        | 0.0033          | 9.4             |         |
| Genes Upregulated Age     | Esr1b        | Zinc-coordinating      | Hormone-nuclear Receptor  | 71               | 166                  | 4804                 | 8073       | 143           | 0.0087           | 8841                        | 0.00694         | 9.4             |         |
| Genes Upregulated Age     | Sox2         | Other Alpha-Helix      | High Mobility Group       | 27               | 210                  | 1717                 | 11160      | 39            | 0.00297          | 2060                        | 0.00202         | 9.3             |         |
| Genes Upregulated Age     | Optix        | Helix-Turn-Helix       | Homeo                     | 149              | 88                   | 9092                 | 3785       | 729           | 0.0185           | 49496                       | 0.0162          | 8.0             |         |
| Upregulated Aging Genes   | ovo          | Zinc-coordinating      | BetaBetaAlpha-zinc finger | 117              | 120                  | 7707                 | 5170       | 384           | 0.0175           | 26065                       | 0.0154          | 7.8             |         |
| Upregulated Aging Genes   | prd          | Helix-Turn-Helix       | Homeo                     | 117              | 120                  | 7707                 | 5170       | 384           | 0.0175           | 26065                       | 0.0154          | 7.8             |         |
| Upregulated Aging Genes   | Pou5f1       | Helix-Turn-Helix       | Homeo                     | 39               | 198                  | 2631                 | 10246      | 59            | 0.00449          | 3527                        | 0.00346         | 7.7             |         |
| Upregulated Aging Genes   | Myc          | Zipper-Type            | Helix-Loop-Helix          | 168              | 168                  | 4876                 | 8001       | 141           | 0.00715          | 8925                        | 0.00584         | 7.6             |         |
| Upregulated Aging Genes   | RORA_1       | Zinc-coordinating      | Hormone-nuclear Receptor  | 71               | 166                  | 4500                 | 8377       | 124           | 0.00629          | 7831                        | 0.00513         | 7.2             |         |
| Upregulated Aging Genes   | ESR2         | Zinc-coordinating      | Hormone-nuclear Receptor  | 8                | 229                  | 359                  | 12518      | 8             | 0.00073          | 368                         | 0.000434        | 6.3             |         |
| Upregulated Aging Genes   | D            | Other Alpha-Helix      | High Mobility Group       | 116              | 121                  | 7050                 | 5827       | 302           | 0.0168           | 21057                       | 0.0152          | 6.1             |         |
| Upregulated Aging Genes   | ESR1         | Zinc-coordinating      | Hormone-nuclear Receptor  | 1                | 236                  | 23                   | 12854      | 1             | 0.000101         | 23                          | 3.01E-05        | 5.6             |         |
| Upregulated Aging Genes   | tin          | Helix-Turn-Helix       | Homeo                     | 106              | 131                  | 7112                 | 5765       | 320           | 0.013            | 22332                       | 0.0117          | 5.3             |         |
| Upregulated Aging Genes   | kni          | Zinc-coordinating      | Hormone-nuclear Receptor  | 53               | 184                  | 3500                 | 9377       | 79            | 0.00481          | 5231                        | 0.00411         | 4.8             |         |
| Upregulated Aging Genes   | so           | Helix-Turn-Helix       | Homeo                     | 131              | 106                  | 8302                 | 4575       | 504           | 0.0153           | 35795                       | 0.0141          | 4.8             |         |
| Upregulated Aging Genes   | RXR::RAR_DR  | Zinc-coordinating      | Hormone-nuclear Receptor  | 6                | 231                  | 338                  | 12539      | 7             | 0.000603         | 354                         | 0.000394        | 4.6             |         |
| Upregulated Aging Genes   | NFYA         | Other Alpha-Helix      | NFY CCAAT-binding         | 52               | 185                  | 3325                 | 9552       | 71            | 0.00576          | 4793                        | 0.00502         | 4.6             |         |
| Upregulated Aging Genes   | FOXF2        | Winged Helix-Turn-Heli | Forkhead                  | 70               | 167                  | 4241                 | 8636       | 103           | 0.00731          | 7073                        | 0.00648         | 4.6             |         |
| Upregulated Aging Genes   | Myf          | Zipper-Type            | Helix-Loop-Helix          | 81               | 156                  | 5224                 | 7653       | 153           | 0.00931          | 10656                       | 0.00837         | 4.6             |         |
| Upregulated Aging Genes   | Gfi1         | Zinc-coordinating      | BetaBetaAlpha-zinc finger | 132              | 105                  | 8480                 | 4397       | 550           | 0.0279           | 40098                       | 0.0262          | 4.5             |         |
| Upregulated Aging Genes   | Ddit3::Cebpa | Zipper-Type            | Leucine Zipper            | 68               | 169                  | 4780                 | 8097       | 125           | 0.0076           | 8620                        | 0.00677         | 4.5             |         |
| Upregulated Aging Genes   | HNF1A        | Helix-Turn-Helix       | Homeo                     | 30               | 207                  | 2090                 | 10787      | 41            | 0.00291          | 2631                        | 0.00241         | 4.5             |         |
| Upregulated Aging Genes   | CREB1        | Zipper-Type            | Leucine Zipper            | 75               | 162                  | 5388                 | 7489       | 153           | 0.0062           | 10435                       | 0.00546         | 4.4             |         |
| Upregulated Aging Genes   | AP1          | Zipper-Type            | Leucine Zipper            | 143              | 94                   | 8894                 | 3983       | 679           | 0.0241           | 49419                       | 0.0226          | 4.3             |         |
| Upregulated Aging Genes   | Foxa1        | Winged Helix-Turn-Heli | Forkhead                  | 98               | 139                  | 6701                 | 6176       | 254           | 0.0142           | 18136                       | 0.0131          | 4.3             |         |
| Upregulated Aging Genes   | SOX9         | Other Alpha-Helix      | High Mobility Group       | 119              | 118                  | 8007                 | 4870       | 428           | 0.0195           | 30976                       | 0.0182          | 4.2             |         |
| Upregulated Aging Genes   | Sox5         | Other Alpha-Helix      | High Mobility Group       | 134              | 103                  | 8981                 | 3896       | 755           | 0.0268           | 55223                       | 0.0253          | 4.2             |         |
| Upregulated Aging Genes   | Gsc          | Helix-Turn-Helix       | Homeo                     | 126              | 111                  | 8120                 | 4757       | 413           | 0.0126           | 29447                       | 0.0116          | 4.1             |         |
| Upregulated Aging Genes   | CEBPA        | Zipper-Type            | Leucine Zipper            | 143              | 94                   | 9016                 | 3861       | 707           | 0.0323           | 52050                       | 0.0307          | 4.1             |         |
| Upregulated Aging Genes   | vnd          | Helix-Turn-Helix       | Homeo                     | 113              | 124                  | 7447                 | 5430       | 357           | 0.0163           | 25759                       | 0.0152          | 4.0             |         |
| Upregulated Aging Genes   | oc           | Helix-Turn-Helix       | Homeo                     | 120              | 117                  | 7831                 | 5046       | 364           | 0.0111           | 25900                       | 0.0102          | 4.0             |         |
| Downregulated Aging Genes | Esr1b        | Zinc-coordinating      | Hormone-nuclear Receptor  | 109              | 80                   | 4804                 | 8073       | 238           | 0.00794          | 8841                        | 0.00694         | 7.2             |         |
| Downregulated Aging Genes | MEF2A        | Other Alpha-Helix      | MADS                      | 103              | 86                   | 5047                 | 7830       | 266           | 0.00739          | 9936                        | 0.0065          | 6.6             |         |
| Downregulated Aging Genes | gt           | Zipper-type            | Leucine Zipper            | 71               | 118                  | 2980                 | 9897       | 115           | 0.0032           | 4135                        | 0.00271         | 5.6             |         |
| Downregulated Aging Genes | hth          | Helix-Turn-Helix       | Homeo                     | 148              | 41                   | 8223                 | 4654       | 927           | 0.0155           | 36588                       | 0.0144          | 5.5             |         |
| Downregulated Aging Genes | Pax6         | Helix-Turn-Helix       | Homeo                     | 34               | 155                  | 1182                 | 11695      | 40            | 0.00156          | 1350                        | 0.00124         | 5.4             |         |
| Downregulated Aging Genes | HOXAS        | Helix-Turn-Helix       | Homeo                     | 169              | 20                   | 10289                | 2588       | 3644          | 0.081            | 150368                      | 0.0787          | 5.1             |         |
| Downregulated Aging Genes | HLF          | Zipper-Type            | Leucine Zipper            | 113              | 76                   | 5284                 | 7593       | 260           | 0.00867          | 10110                       | 0.00794         | 4.9             |         |
| Downregulated Aging Genes | vis          | Helix-Turn-Helix       | Homeo                     | 146              | 43                   | 7694                 | 5183       | 756           | 0.0126           | 29848                       | 0.0117          | 4.9             |         |
| Downregulated Aging Genes | PBX1         | Helix-Turn-Helix       | Homeo                     | 89               | 100                  | 4013                 | 8864       | 177           | 0.0059           | 6767                        | 0.00532         | 4.8             |         |
| Downregulated Aging Genes | run::Bgb     | Ig-fold                | Runt                      | 121              | 68                   | 6193                 | 6684       | 380           | 0.00951          | 14864                       | 0.00876         | 4.8             |         |
| Downregulated Aging Genes | RREB1        | Zinc-coordinating      | BetaBetaAlpha-zinc finger | 17               | 172                  | 771                  | 12106      | 25            | 0.00139          | 859                         | 0.00112         | 4.7             |         |
| Downregulated Aging Genes | Sox17        | Other Alpha-Helix      | High Mobility Group       | 155              | 34                   | 8674                 | 4203       | 1138          | 0.0285           | 46334                       | 0.0273          | 4.3             |         |
| Downregulated Aging Genes | achi         | Helix-Turn-Helix       | Homeo                     | 150              | 39                   | 8011                 | 4866       | 849           | 0.0142           | 33978                       | 0.0133          | 4.3             |         |
| Downregulated Aging Genes | z            | Helix-Turn-Helix       | Zeste                     | 145              | 44                   | 7862                 | 5015       | 761           | 0.0212           | 30843                       | 0.0202          | 4.1             |         |
| Downregulated Aging Genes | FOX11        | Winged Helix-Turn-Heli | Forkhead                  | 152              | 37                   | 8378                 | 4499       | 960           | 0.032            | 39276                       | 0.0309          | 4.1             |         |
