# Supplementary material for: Expression patterns of cardiac aging in Drosophila
Source: PubMed Central journal article supplement (PMC5242310; doi:10.1111/acel.12559), 2017-01-16
Supplement: ACEL-16-82-s008.pdf [file ACEL-16-82-s008.pdf]

## List of supporting information

### SUPPLEMENTARY TABLES

Supplementary Table 1: Age-related genes

Supplementary Table 2: GO terms enriched in up- and down-regulated genes

Supplementary Table 3: Genes differentially regulated in fly and rodent gene sets

Supplementary Table 4: oPOSSUM transcription factor binding site enrichment analysis in proximal promoters of aging responsive genes.

### **Supplementary Figure 1. Heart-to-heart variability in normalized gene expression.**

Hearts from 1- and 5-week old *yw* flies. n=15-16. Permutation test  $p < 0.05$ . Gene expression normalized to expression of *Mcm2*.

**Supplemental Figure 2. Induced *Odd* expression in old flies.** A) 5-6-week-old female *Drosophila* hearts labeled for *Odd* (green) and *Gapdh1* (red) transcripts. Shown are 5 week old female hearts, with heart-specific expression of RU486-inducible Gal4 (Hand-GS-Gal4). Under RU486-free baseline conditions (left three panels), *Odd* expression is detected in pericardial cells (PCs, arrowheads), and lower levels in the heart tube (outlined area). Induction of Gal4 activity causes up-regulation of *Odd* RNA in the heart tube and PCs. B) Quantification of *Odd* transcript induction following RU486-administration for 1 week ( $*p < 0.05$ , unpaired t-test).

**Supplemental Figure 3. miR-1 expression.** A) qPCR of miR-1 expression in 1- and 5-week-old fly hearts. B) miR-1 sequence alignment showing conservation of sequence between *D. melanogaster* and human (hsa), and *D. melanogaster* and mouse (mmu). Sequences from miRBase (<http://www.mirbase.org>).
